# Supplementary material for: Enhanced glycolysis-derived lactate promotes microglial activation in Parkinson's disease via histone lactylation
Source: Research Square preprint supplement (doi:10.21203/rs.3.rs-3249462/v1), 2023-08-17

**Figure.1. Inhibition of glycolysis improves motor function and alleviates microglial activation in PD mice.**


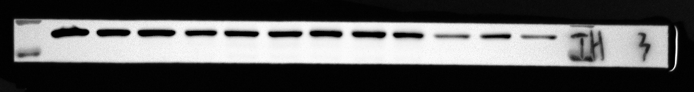


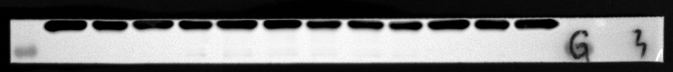


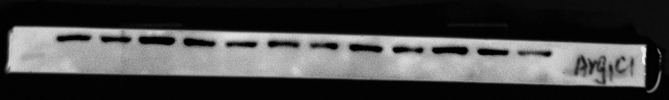


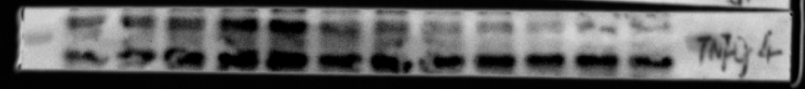


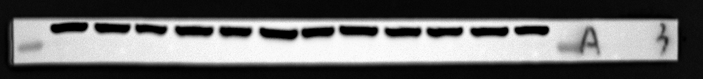


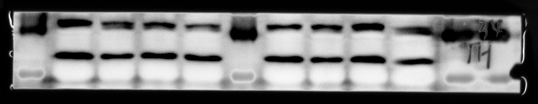


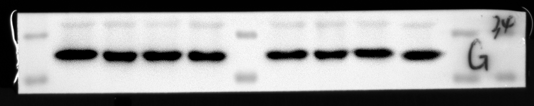


**FIG.S1.Inhibition of glycolysis improved motor function and reduced microglial activation in PD mice**


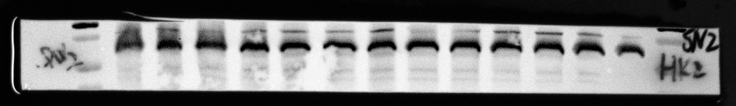


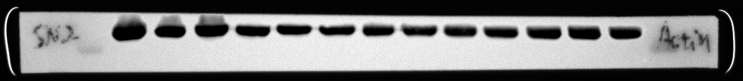


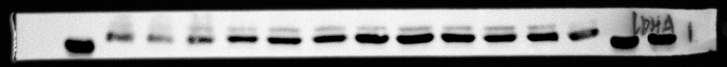


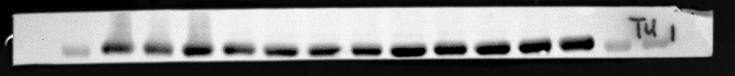


**Figure.2. Enhanced glycolysis-derived lactate promotes microglial activation.**

LDHA
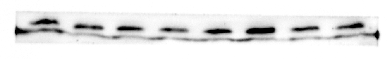


β-actin
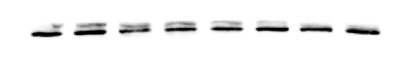


iNOS
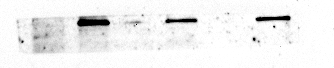


actin
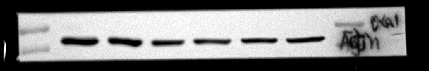


**Figure. S2. Enhanced glycolysis-derived lactate promotes microglial activation.**


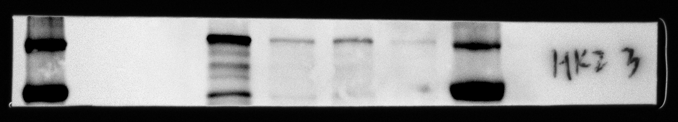


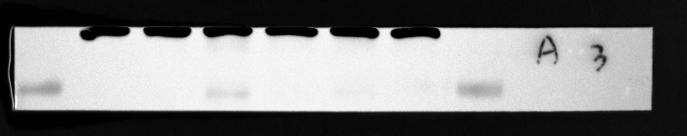


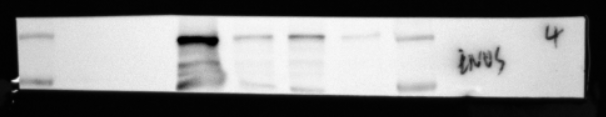


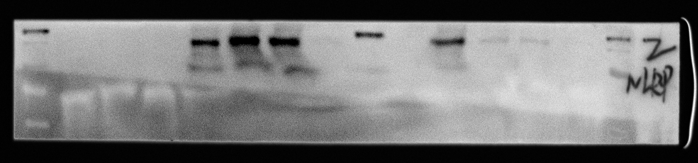


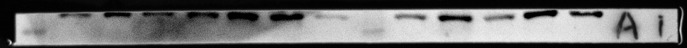


**Figure.3. Enhanced glycolysis-derived lactate promotes microglial activation through histone lactylation.**


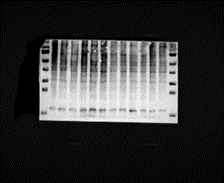


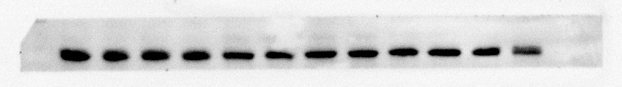


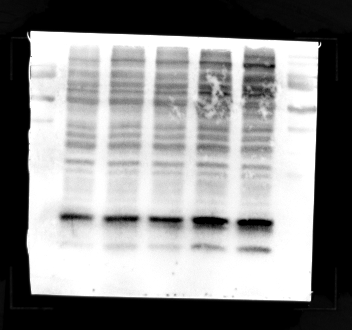


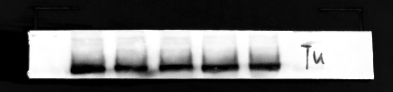


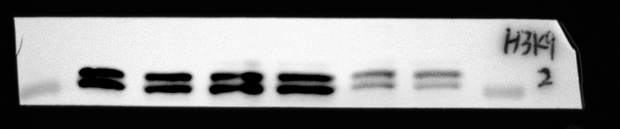


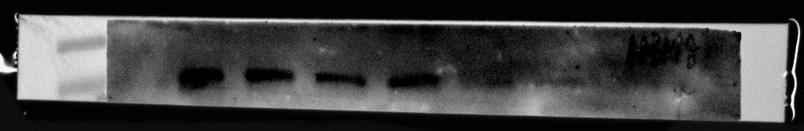


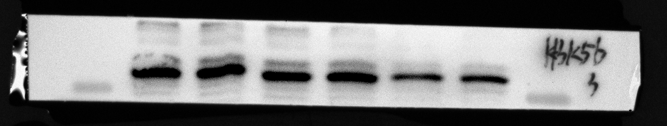


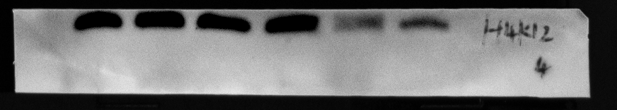


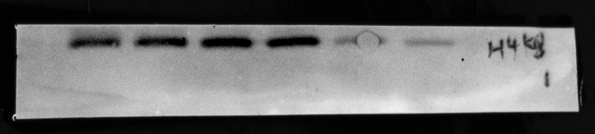


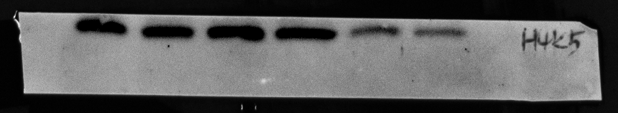


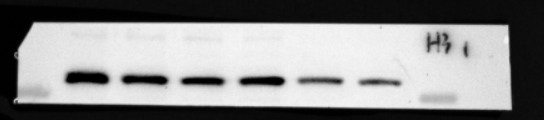


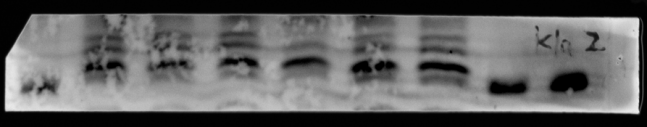


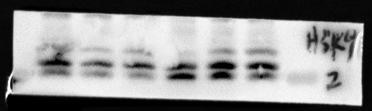


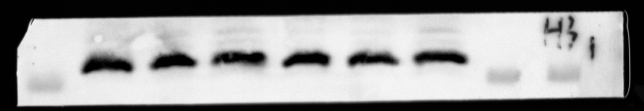


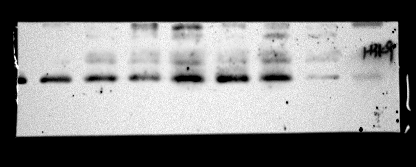


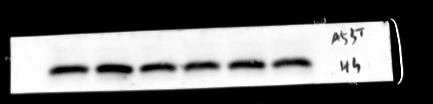


**Figure.S3. Enhanced glycolysis-derived lactate promotes microglial activation through histone lactylation**


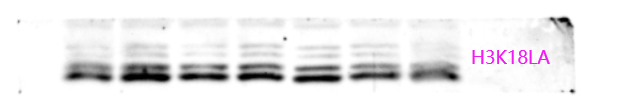


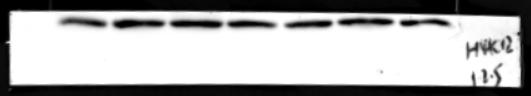


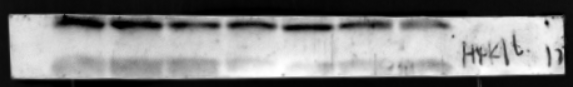


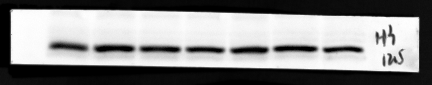


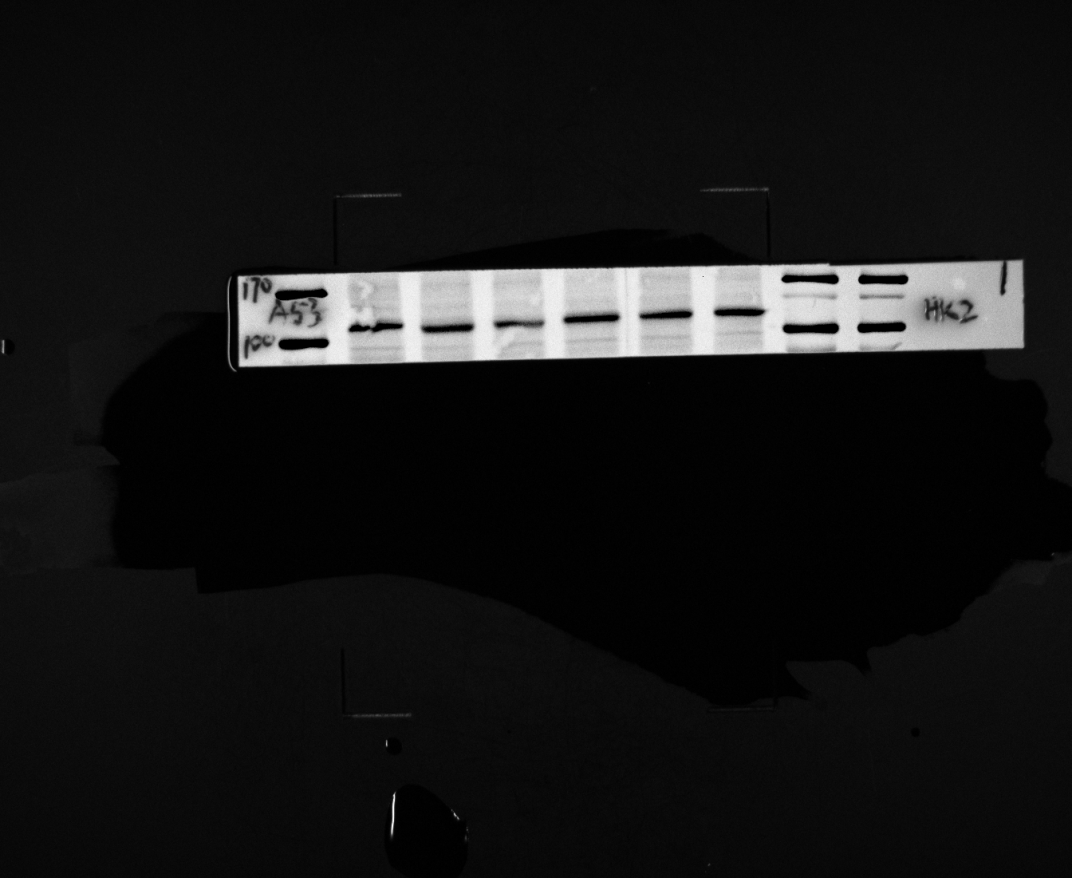


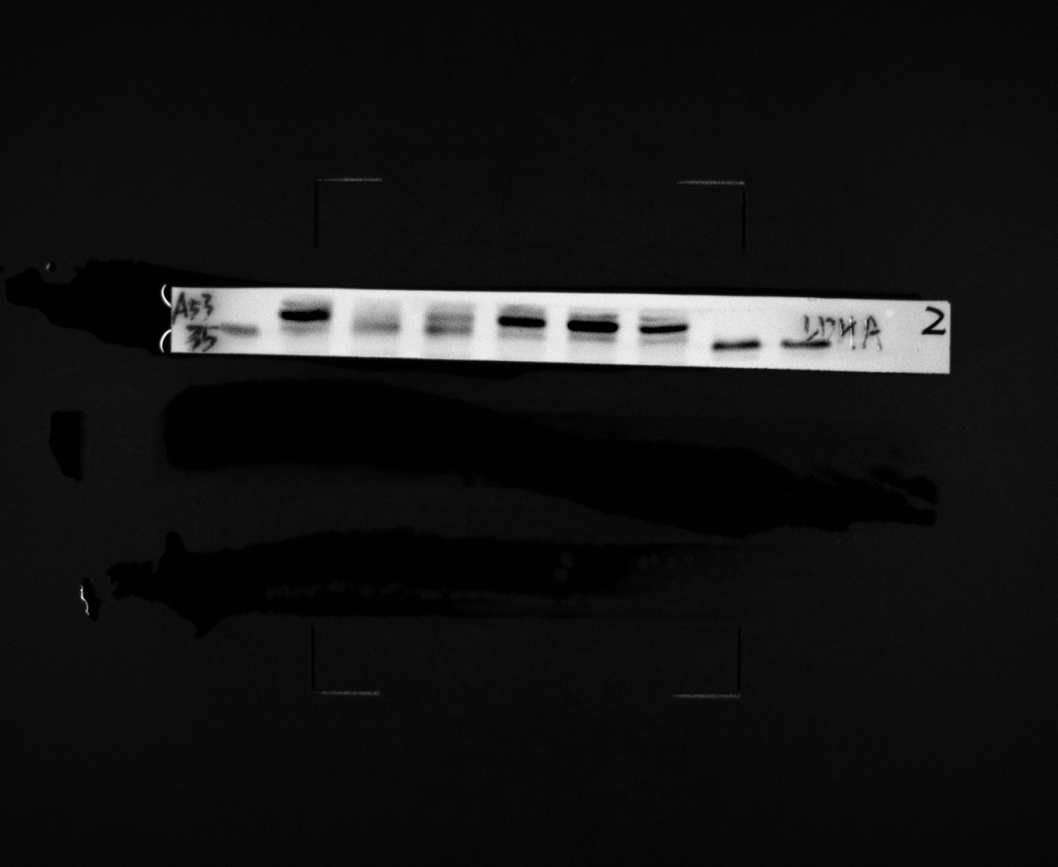


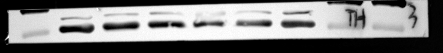


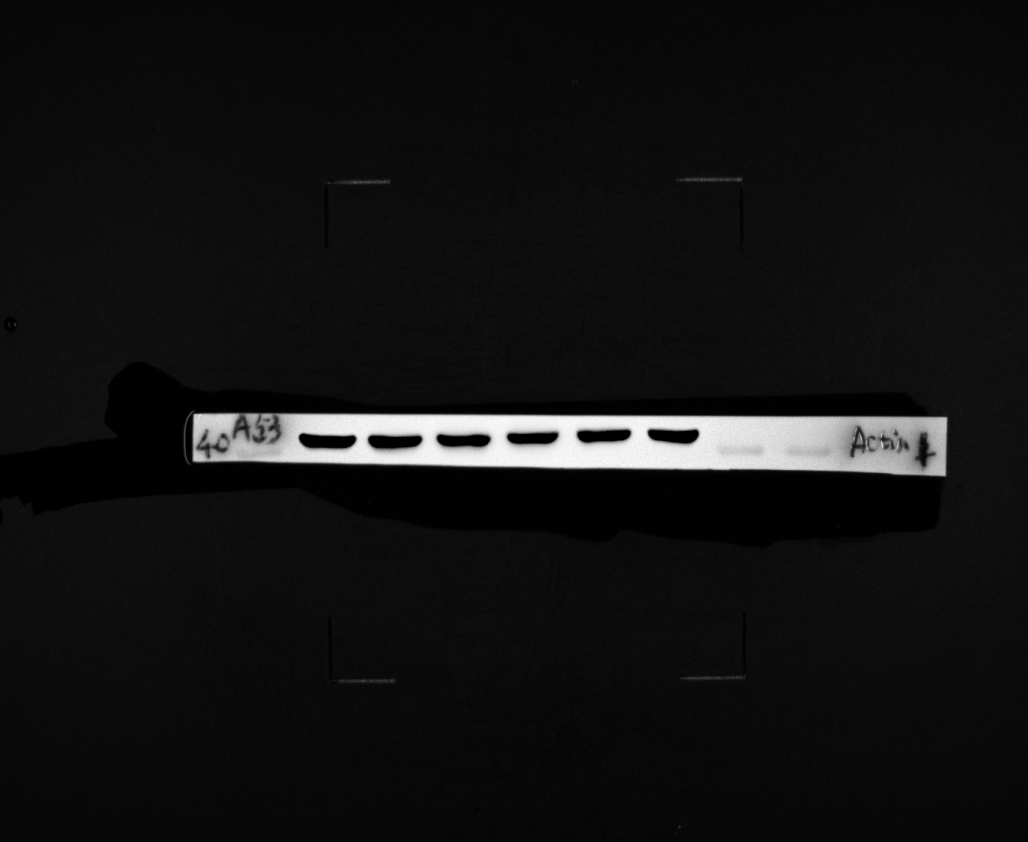


**Figur. 4. Inhibition of glycolysis reduces the activation of microglia by reducing histone lactylation.**


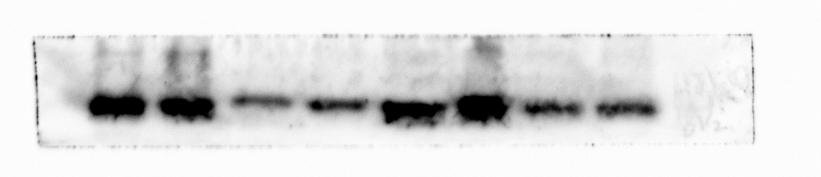


H3K9la


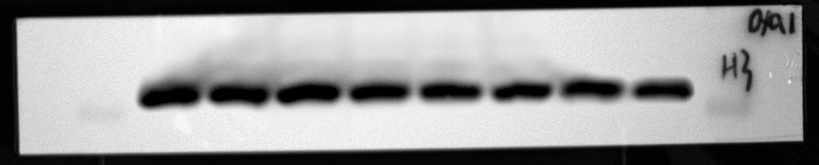


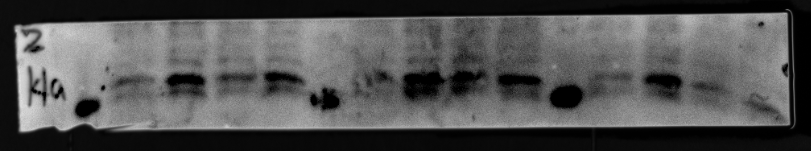


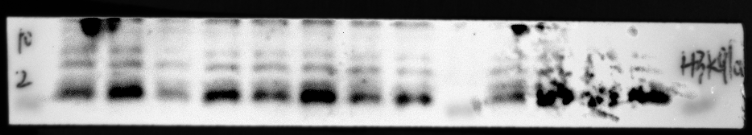


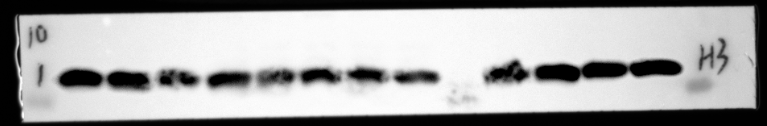


**Figure.S4. Inhibition of glycolysis reduces the activation of microglia by reducing histone lactylation.**


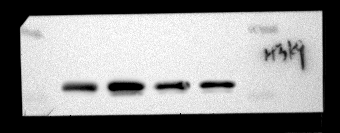


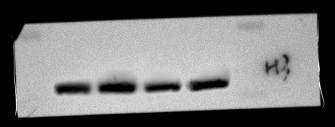


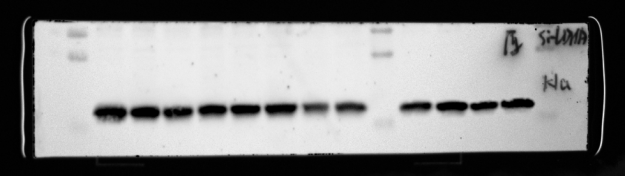


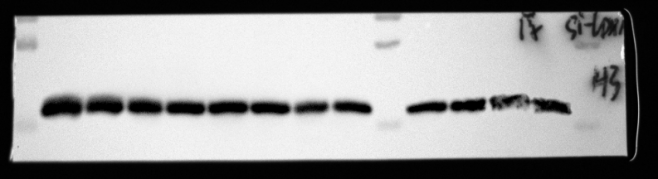


**Figure. 5. *Slc7a11* is the target of H3K9la and inhibition of SLC7A11 alleviates microglial activation.**


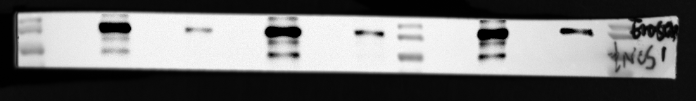


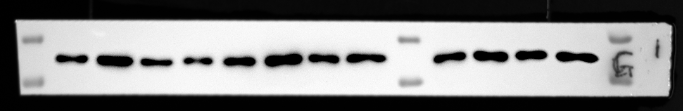


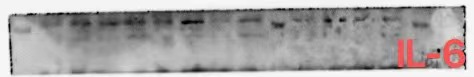

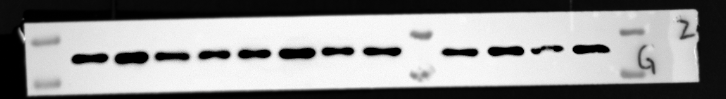


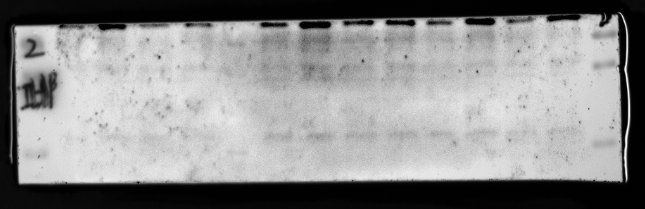


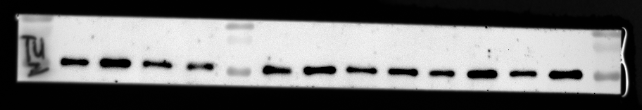


**Figure 7. p300/CBP mediates pan-Kla and H3K9la in LPS-stimulated primary microglia.**


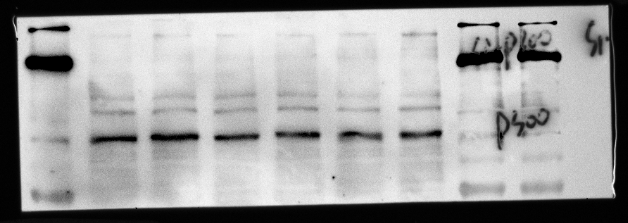


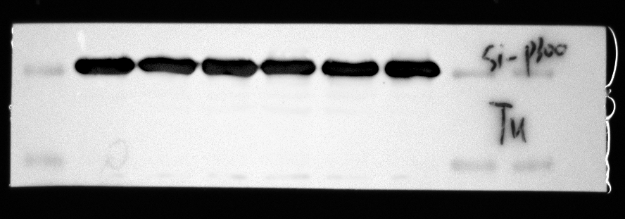


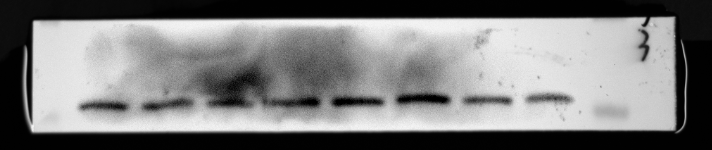


pan-kla


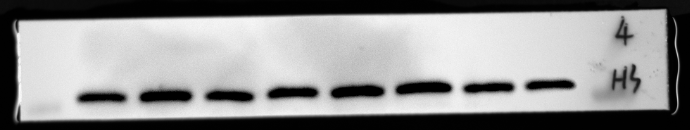


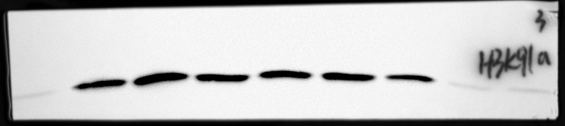


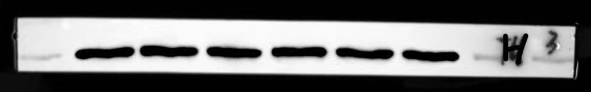


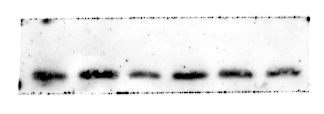


pan-kla


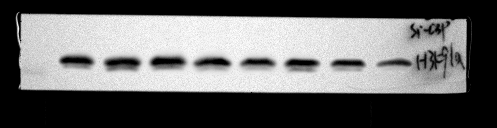


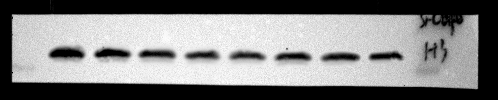


**Figure.7S. C646 reduces histone lactylation and expression of proinflammatory cytokines in LPS-stimulated primary microglia**


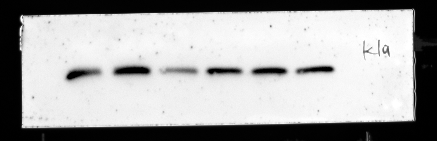


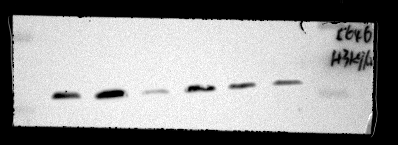


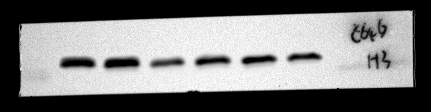


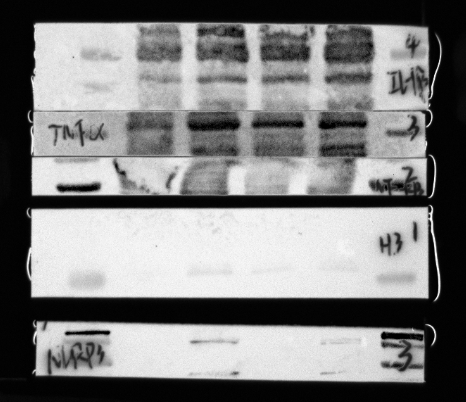


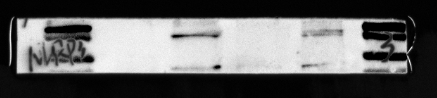


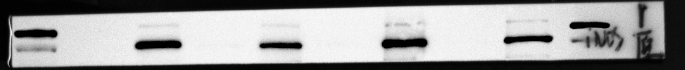


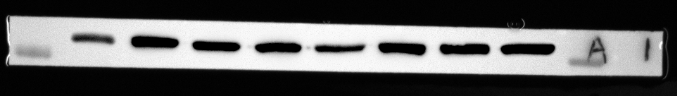

Supplement: Supplementary file 2 [file b24ef0ecf03faeae2f648bf6.docx]
