# Supplementary material for: Enhanced glycolysis-derived lactate promotes microglial activation in Parkinson's disease via histone lactylation
Source: Research Square preprint supplement (doi:10.21203/rs.3.rs-3249462/v1), 2023-08-17
Supplement: Supplementary file 1 [file 4c5892abeb7036d299d2b7fa.docx]

**Supplementary Material**


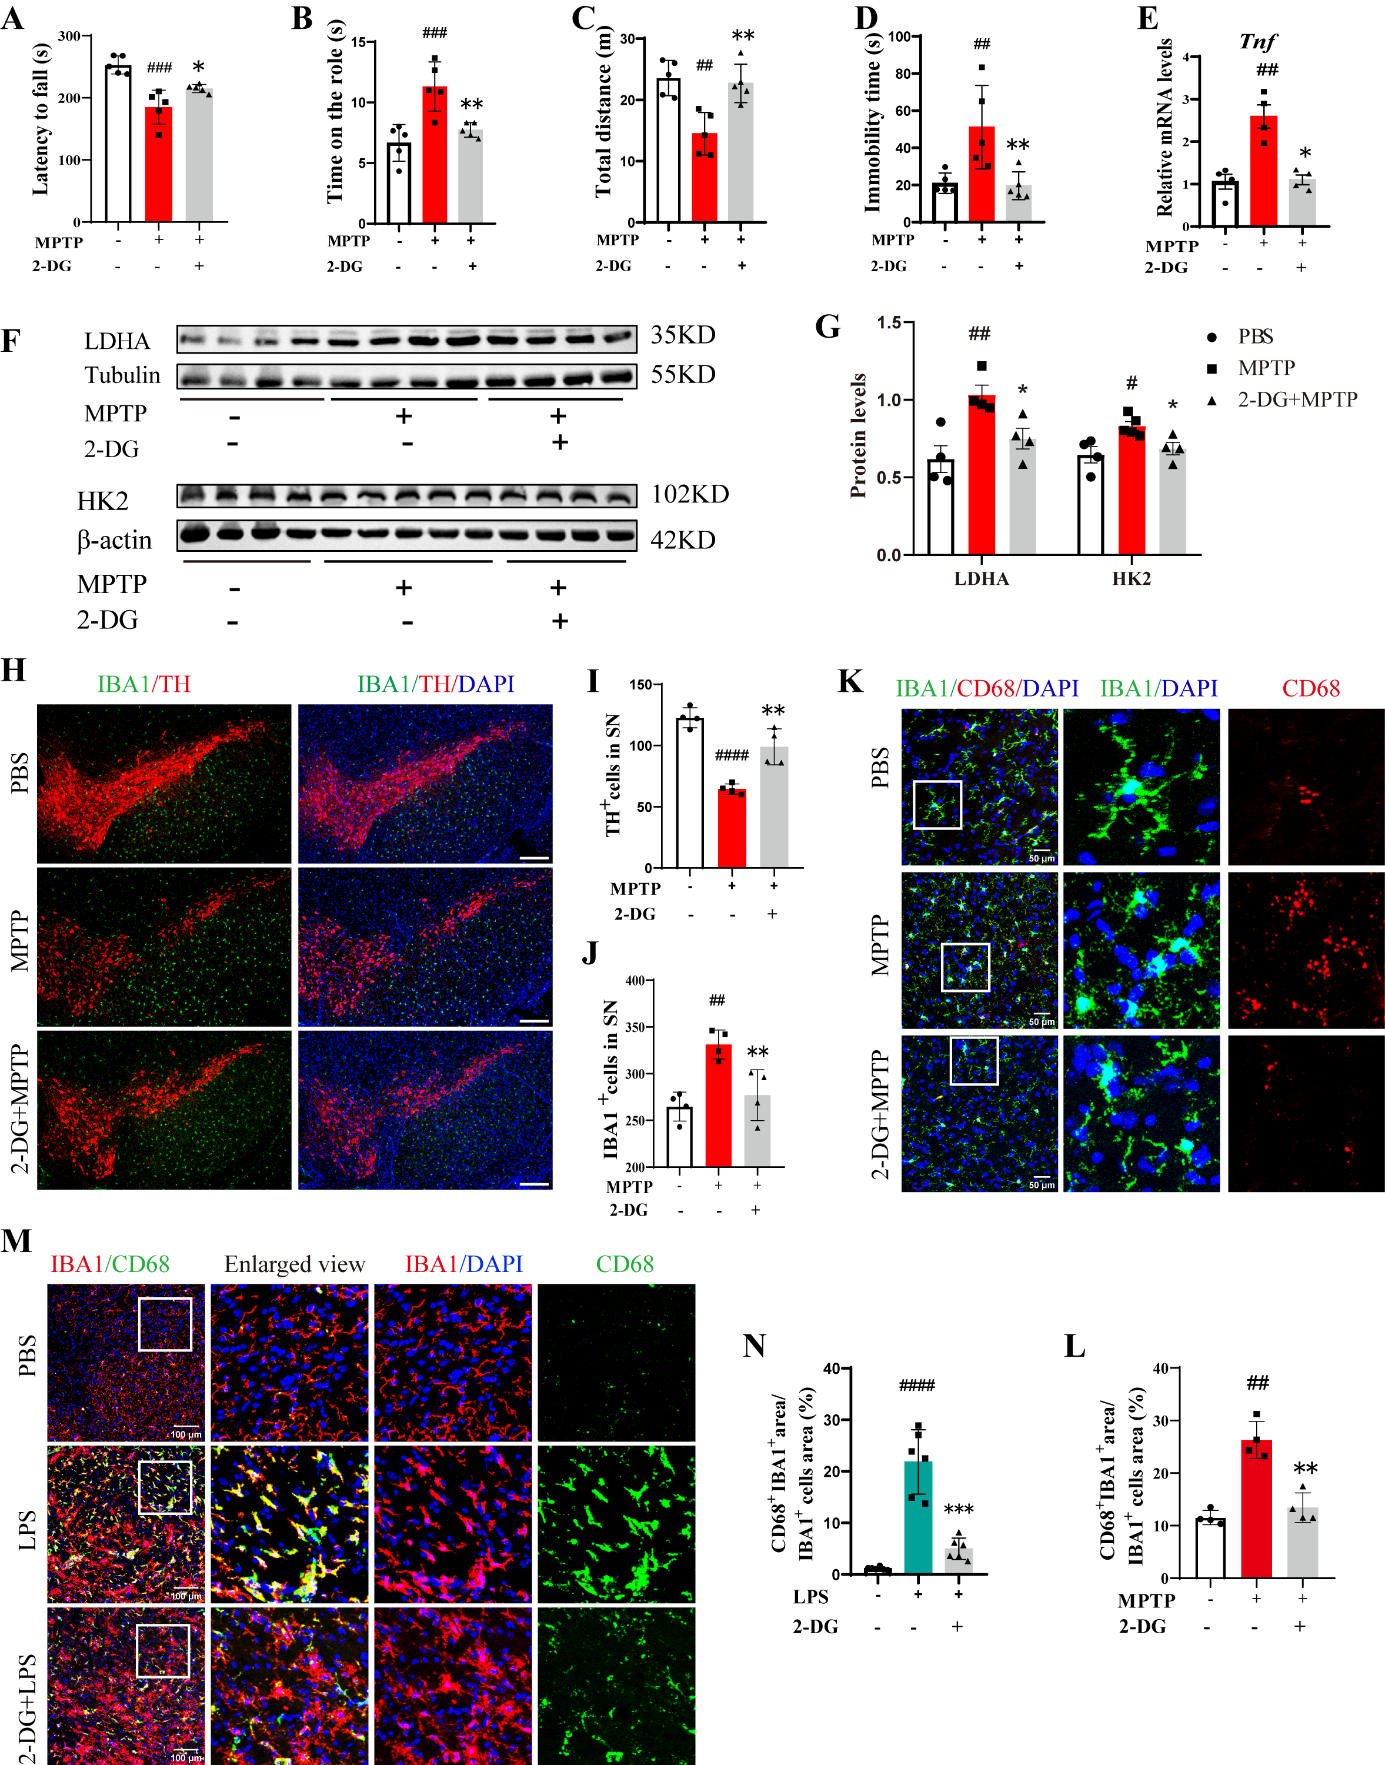


**Figure S1. Inhibition of glycolysis improved motor function and reduced microglial activation in PD mice.** **(A-D)** Quantification of latency to fall in rotarod test, time on the pole in pole test, total distance and immobility time in OFT of Control, MPTP, and 2-DG+MPTP mice. *N*=5 per group. **(E)** *Tnf* mRNA expression in the SN of Control, MPTP, and 2-DG+MPTP mice. *N*=4 per group. **(F-G)** Representative western blot and quantification of LDHA and HK2 in the SN of Control, MPTP, and 2-DG+MPTP mice. *N*=4 per group. **(H)** Representative images of TH (red) and IBA1 (green) in the SN of Control, MPTP, and 2-DG+MPTP mice. Scale bar, 200µm. **(I-J)** Quantification of TH+ cells and IBA1+ cells in the SN of Control, MPTP, and 2-DG+MPTP mice. *N*=4 per group. **(K)** Representative confocal images of IBA1 (green) and CD68 (red) in the SN of Control, MPTP, and 2-DG MPTP mice. Scale bar, 50µm. (**L)** Quantification of the ratio of CD68+IBA1+ area to IBA1+ cells areas of Control, MPTP, and 2-DG+MPTP mice. *N*=4 per group. (**M)** Representative confocal images of IBA1 (green) and CD68 (red) in the SN of Control, LPS, and 2-DG-LPS mice. Scale bar, 100µm. (**N)** Quantification of the ratio of CD68+IBA1+ area to IBA1+ cells areas of Control, LPS, and 2-DG-LPS mice. *N*=6 per group. Data are shown as the mean ± SEM and analyzed with one-way ANOVA followed by Tukey’s multiple comparisons test. Compared to PBS group, #*P* < 0.05, ##*P* < 0.01, ###*P* < 0.001, ####*P* < 0.0001; compared to MPTP group, **P* < 0.05, ***P* < 0.01, ****P* < 0.001.


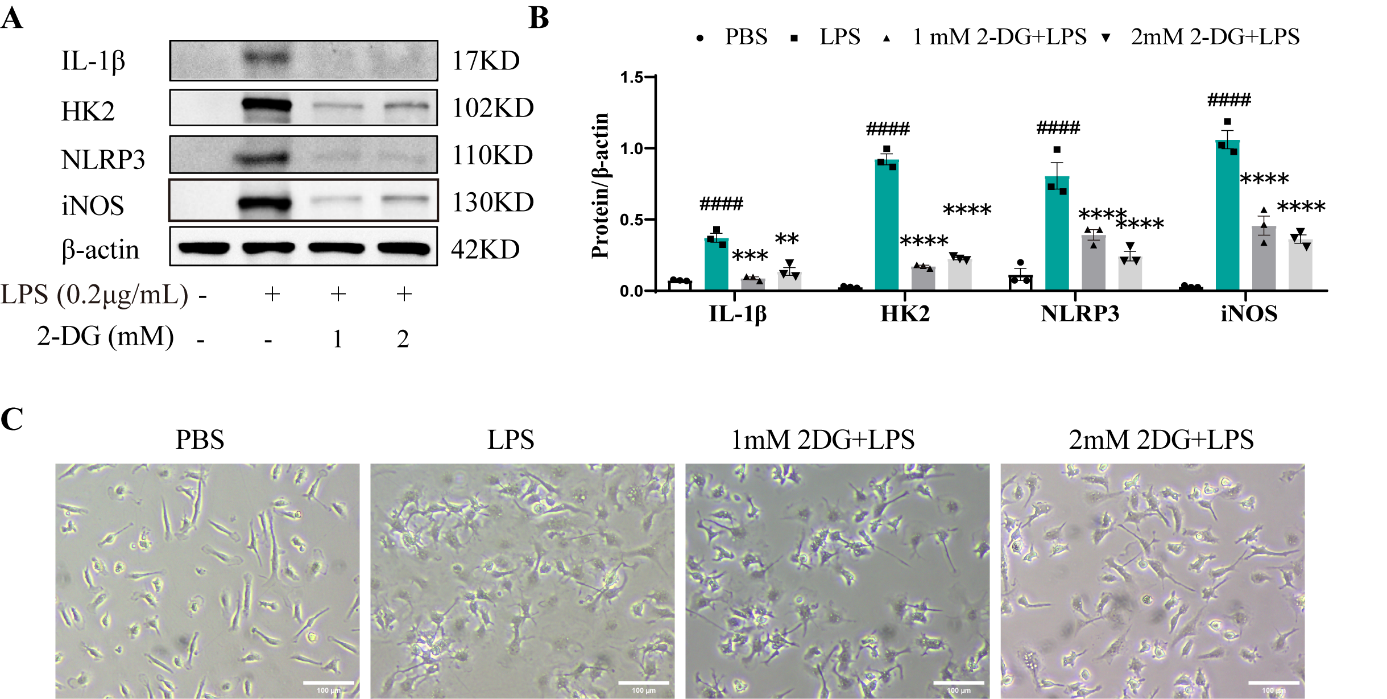


**Figure S2. Enhanced glycolysis-derived lactate promotes microglial activation.** **(A-B)** Representative western blot and quantification of IL-1β，HK2, NLRP3 and iNOS in LPS stimulated primary microglia treated with or without 2-DG. *N*=3 per group. **(C)** Representative image of morphology in primary microglia. Data are shown as the mean ± SEM and analyzed with one-way ANOVA followed by Tukey’s multiple comparisons test. Compared to PBS group, ####*P* < 0.0001; compared to LPS group, ***P* < 0.01, ****P* < 0.001, *****P* < 0.001.


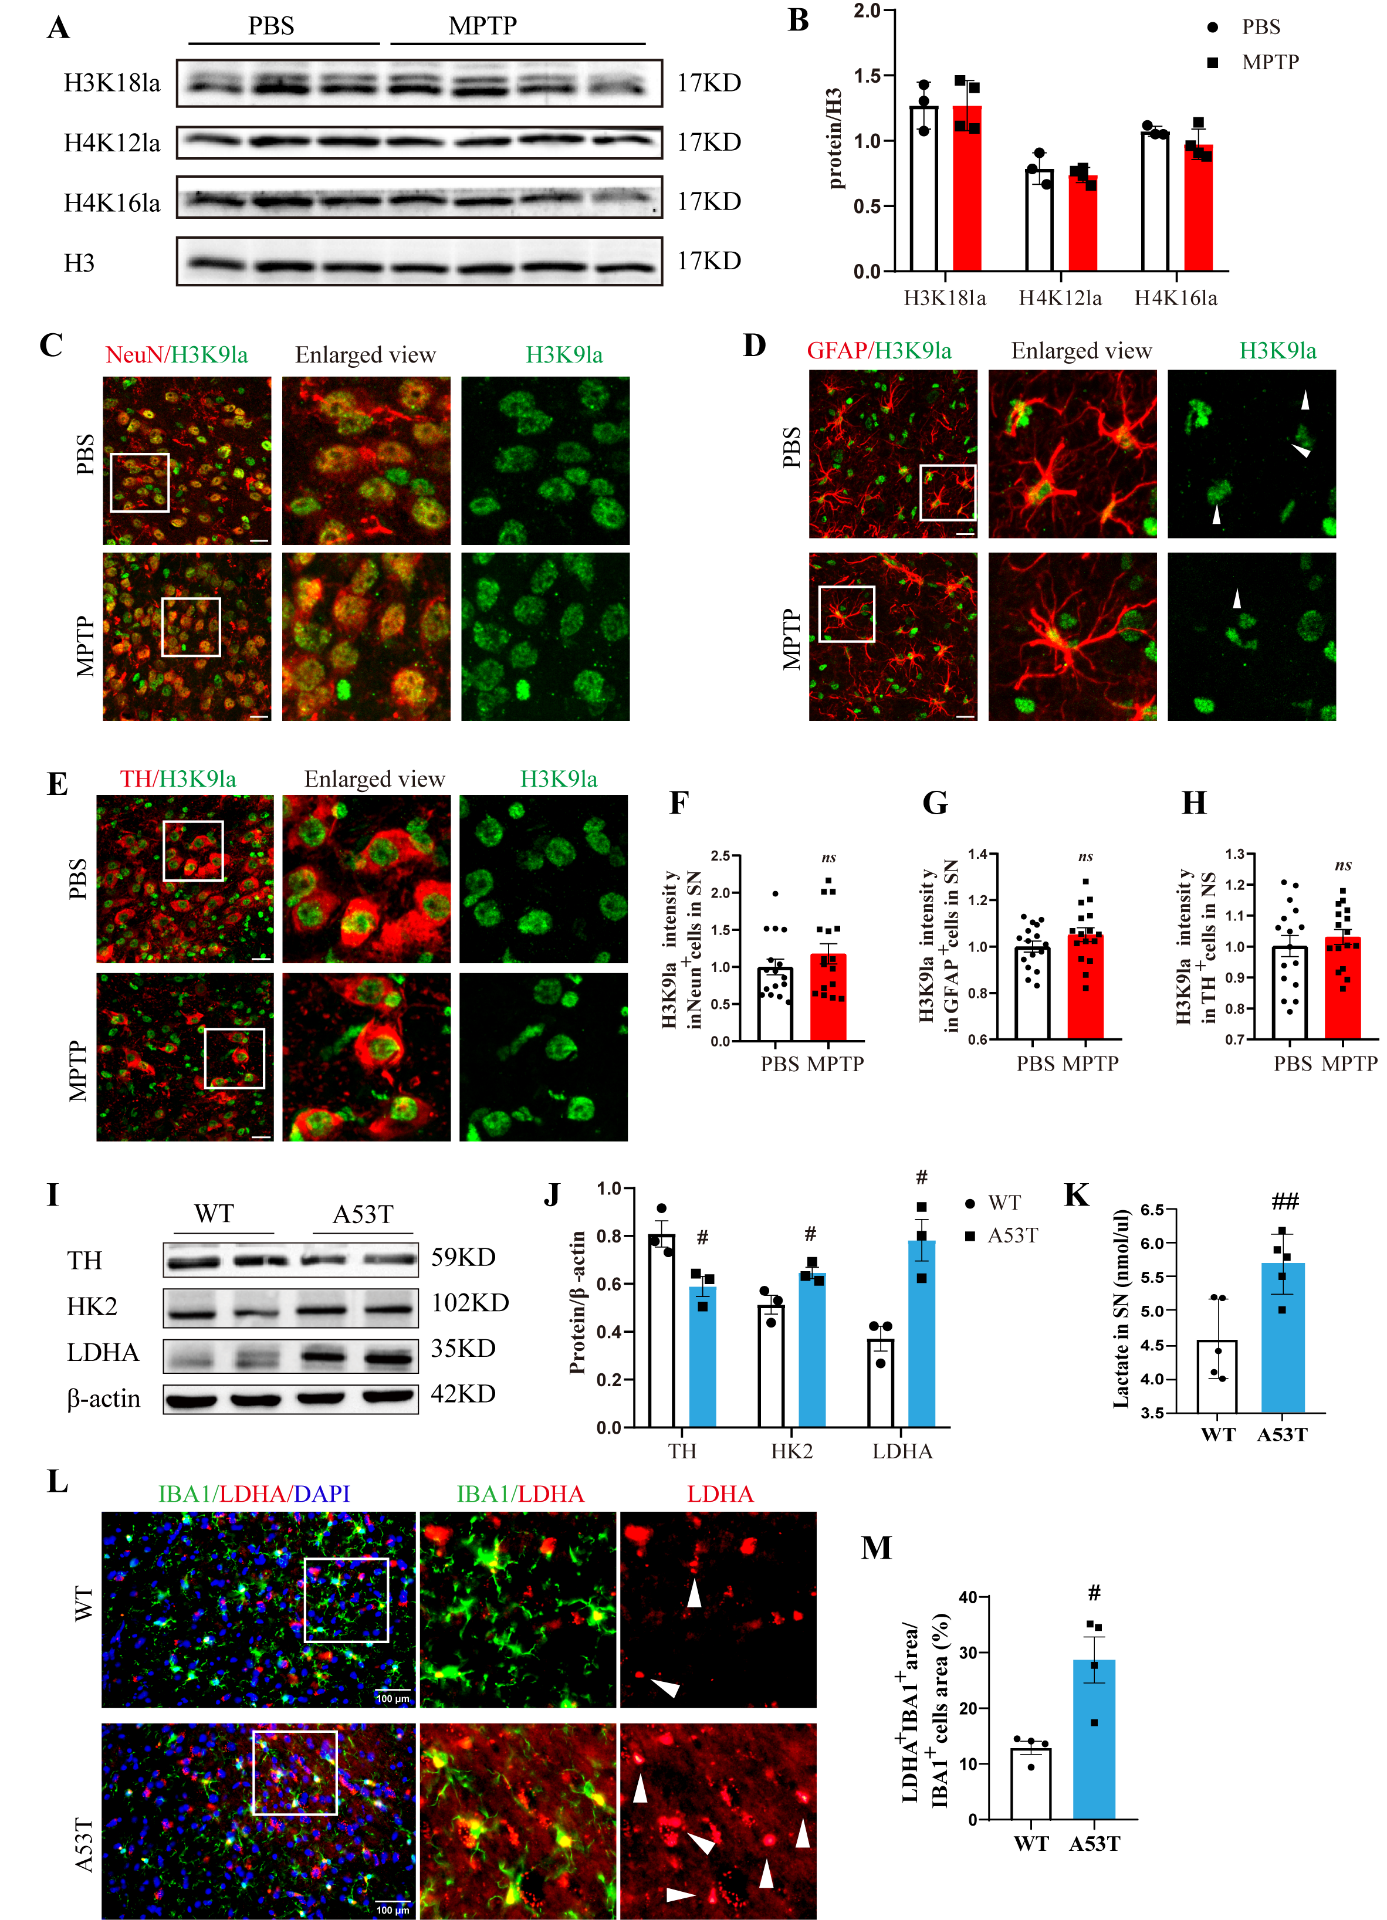


**Figure S3. Enhanced glycolysis-derived lactate promotes microglial activation through histone lactylation. (A-B)** Representative western blot and quantification of H3K18la, H4K12la and H4K16la in control and MPTP mice. *N*=3~4 per group. **(C-E)** Representative confocal images of H3K9la (green) and NeuN (red) or GFAP (red) or TH (red) in the SN of control and MPTP mice. Scale bar, 50 μm. **(F-H)** Quantification of fluorescence intensity of H3K9la in NeuN+ cells and GFAP+ cells and TH+ cells. *N*=4 per group. Four different layers of brain slices were taken from each brain for staining. Two brain slices were 120μm apart, and 4~6 visual fields were taken from each brain slice to averaged, so there were 4 points in each brain. **(I-J)** Representative western blot and quantification of TH, HK2 and LDHA in the SN of WT and A53T mice. *N*=3 per group. **(K)** Lactate concentration in the SN of WT and A53T mice. *N*=5 per group. **(L)** Representative images of IBA1 (green) and LDHA (red) in the SN of WT and A53T mice. Scale bar, 100 μm. **(M)** Quantification of the ratio of LDHA+IBA1+ area to IBA1+ cells area. *N*=4 per group. Data are shown as the mean ± SEM and analyzed with two-tailed unpaired Student’s t-test. Compared to PBS or WT group, #*P* < 0.05, ##*P* < 0.01; *ns*, the difference was not statistically significant*.*


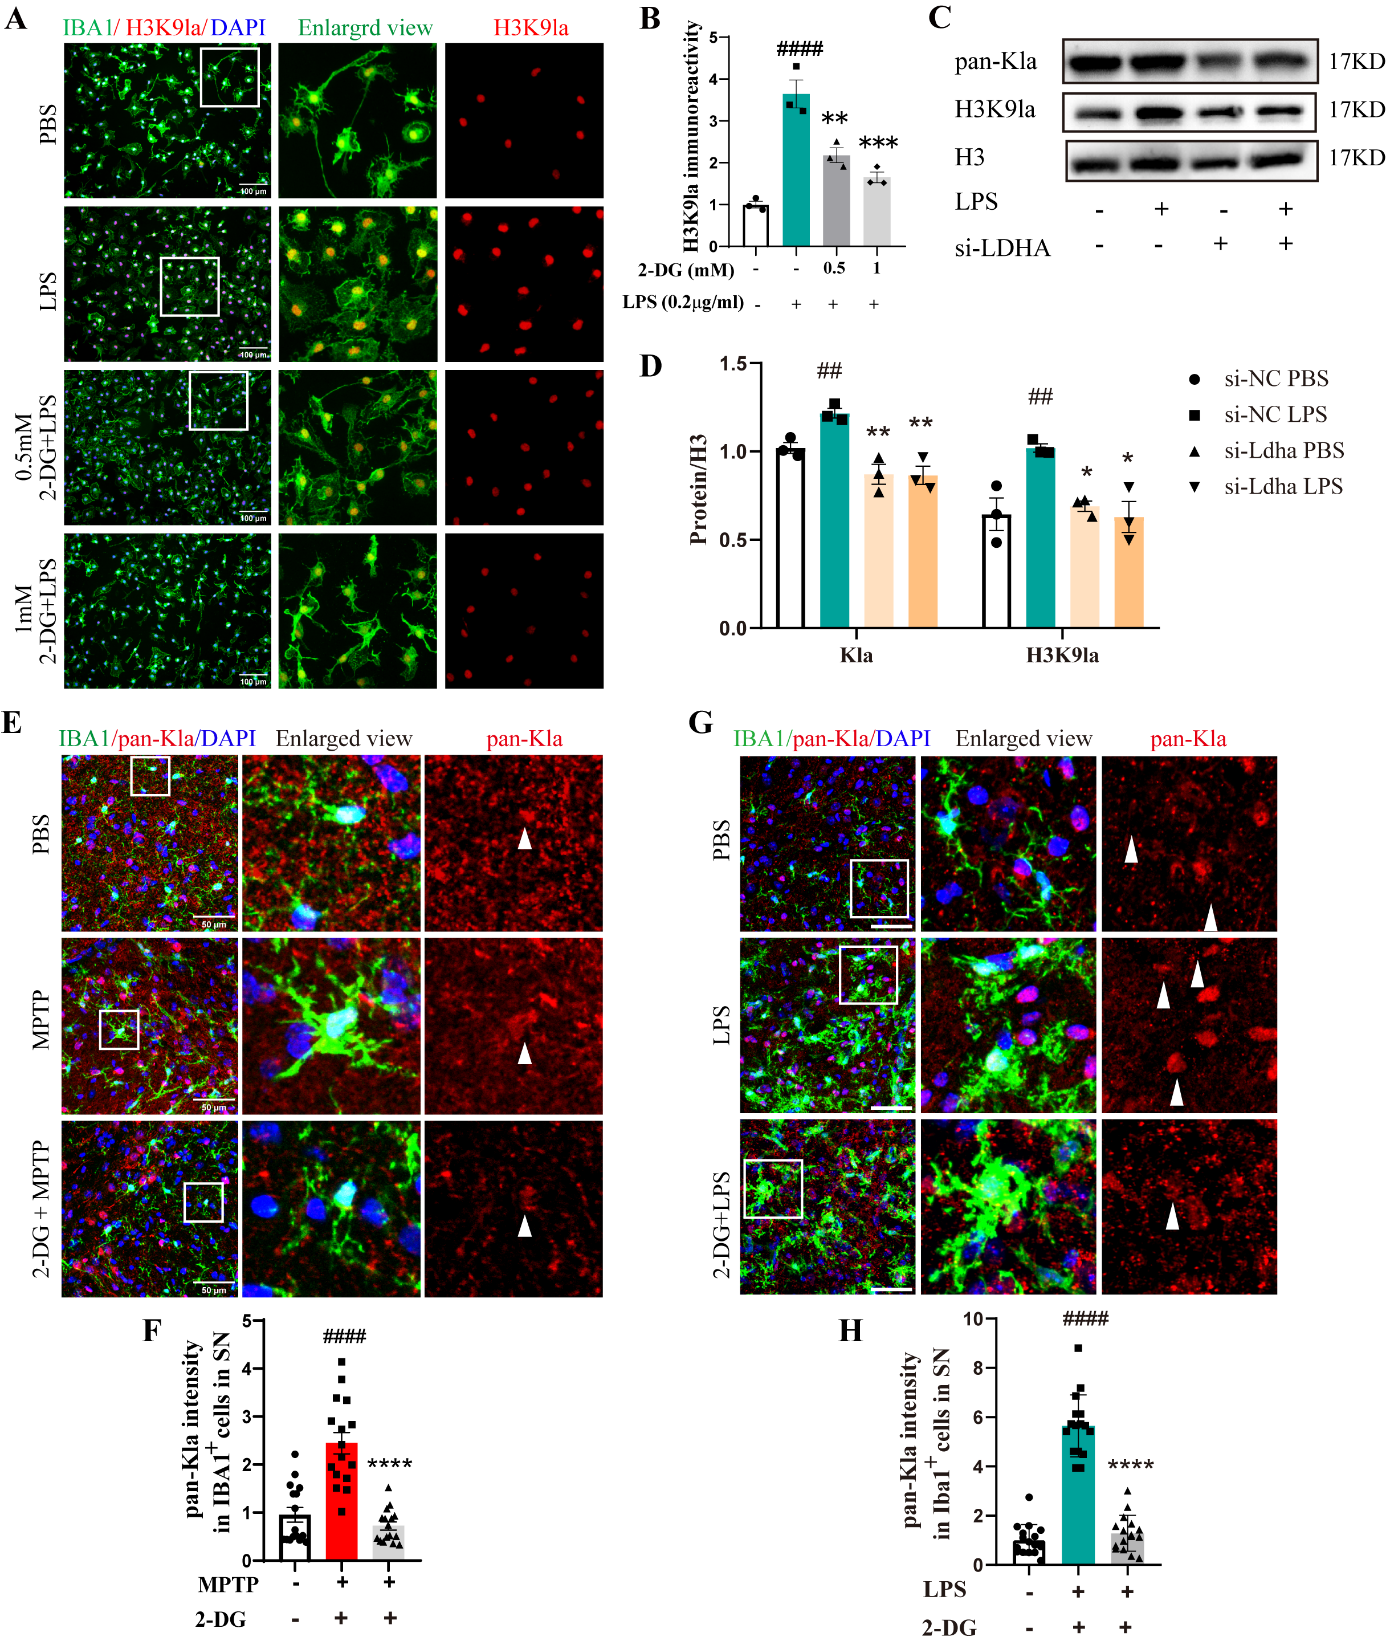


**Figure S4. Inhibition of glycolysis reduces the activation of microglia by reducing histone lactylation. (A)** Representative images of IBA1 (green) and H3K9la (red) in LPS-stimulated primary microglia treated with or without 2-DG. Scale bar, 100 μm. (**B)** Quantification of fluorescence intensity of H3K9la. *N*=3 per group. **(C-D)** Representative western blot and quantification of pan-Kla and H3K9la in primary microglia transfected with si-*Ldha* and stimulated with or without LPS. *N*=3 per group. **(E)** Representative confocal images of IBA1 (green) and pan-Kla (red) in microglia in the SN of Control, MPTP and 2-DG+MPTP mice. Scale bar, 50 μm. **(F)** Quantification of fluorescence intensity of pan-Kla in microglia. *N*=4 per group. **(G)** Representative confocal images of IBA1 (green) and pan-Kla (red) in microglia in the SN of Control, LPS and 2-DG+LPS mice. Scale bar, 50 μm. **(H)** Quantification of fluorescence intensity of pan-Kla in microglia. *N*=4 per group. For fluorescence intensity of pan-Kla, four different layers of brain slices were taken from each brain for staining. Two brain slices were 120μm apart, and 4~6 visual fields were taken from each brain slice to average, so there were 4 points in each brain. Data are shown as the mean ± SEM and analyzed with one-way ANOVA followed by Tukey’s multiple comparisons test. Compared to PBS group, ##*P* < 0.01, ####*P* < 0.0001; compared to MPTP group or LPS group, **P* < 0.05, ***P* < 0.01, ****P* < 0.001, *****P* < 0.0001.


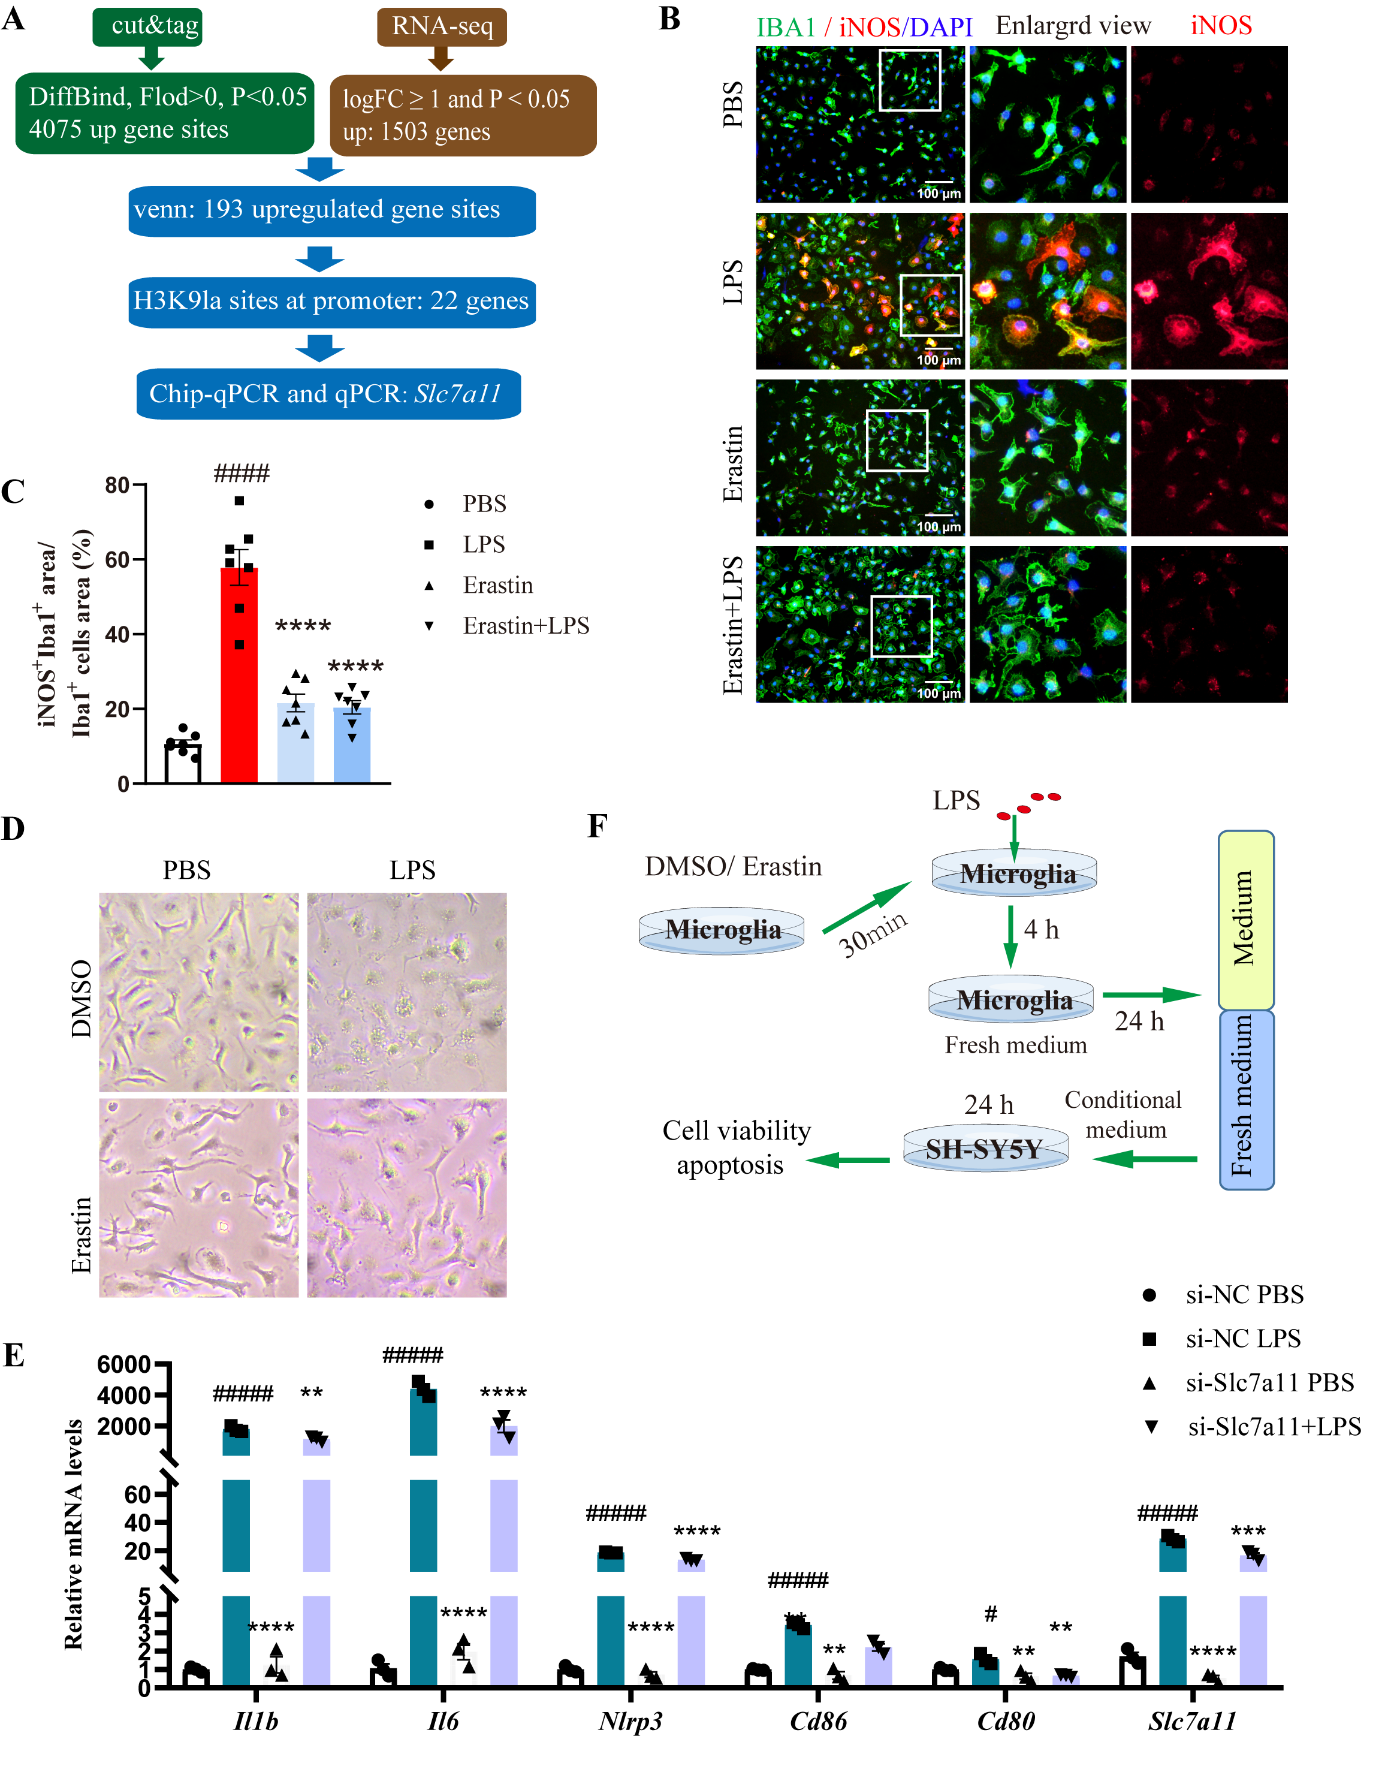


**Figure S5. Inhibition of SLC7A11 alleviates microglial activation and microglia-mediated SH-SY5Y cells apoptosis.** **(A)** Flow chart of H3K9la target genes screening. **(B)** Representative images of IBA1 (green) and iNOS (red) in LPS-stimulated primary microglia treated with or without erastin. Scale bar, 100 μm. **(C)** Quantification of the ratio of iNOS+IBA+ area to IBA+ cells area. *N*=7 per group. **(D)** Representative image of morphology in LPS-stimulated primary microglia treated with or without erastin. **(E)** *Il1b*, *Il6*, *Nlrp3*, *Cd86, Cd80* and *Slc7a11* mRNA expression in primary microglia transfected with si-*Slc7a11* and stimulated with or without LPS. *N*=3 per group. (**F**) Experimental schedule of SH-SY5Y cells stimulated with MCM. Data are shown as the mean ± SEM and analyzed with one-way ANOVA followed by Tukey’s multiple comparisons test. Compared to PBS group, #*P* < 0.05, ####*P* < 0.0001; compared to LPS group, **P* < 0.05, ***P* < 0.01, ****P* < 0.001, *****P* < 0.0001.


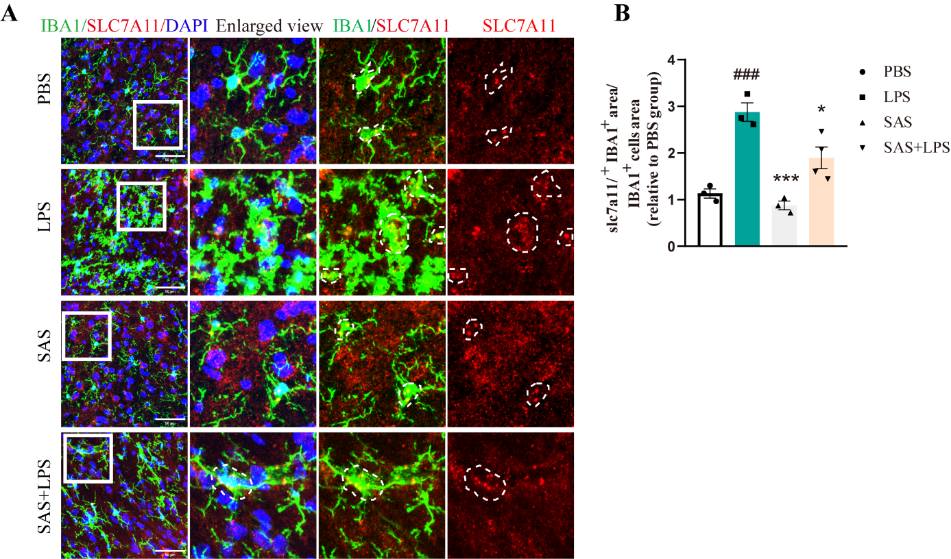


**Figure S6. SAS reduces the levels of SLC7A11 in microglia. (A)** Representative confocal images staining of IBA1 (green) and SLC7A11 (red) in the SN of Control, LPS, and 2-DG LPS mice. Scale bar, 50µm. **(B)** Quantification of the ratio of SLC7A11+IBA1+ area to IBonetwo-way ANOVA followed by Tukey’s multiple comparisons test. Compared to PBS group, ###*P* < 0.001; compared to LPS group, **P* < 0.05, ****P* < 0.001.


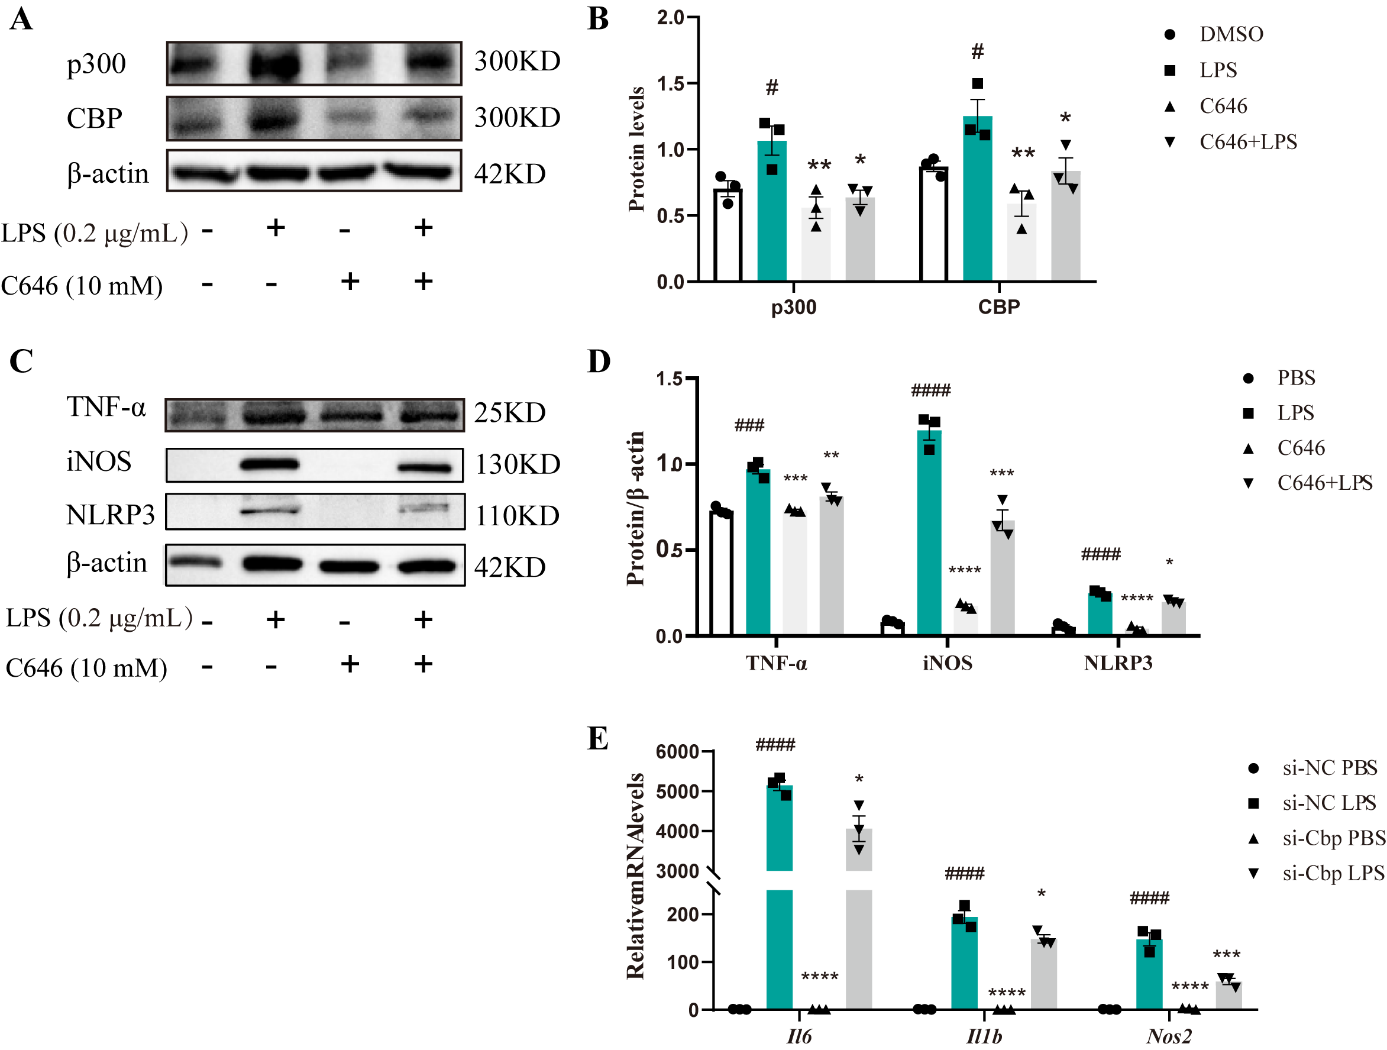


**Figure S7.** **C646 reduces histone lactylation and expression of proinflammatory cytokines in LPS-stimulated primary microglia.** Primary microglia pretreated with or without 10 mM C646 for 30 min thenstimulate with 0.2μg/mL LPS for 24h. **(A-B)** Representative western blot and quantification of p300 and CBP. *N*=3 per group. **(C-D)** Representative western blot and quantification of TNF-α, iNOS, and NLRP36. *N*=3 per group. **(E)** *Il6*, *Il1b* and*Nos2* mRNA expression in in primary microglia transfected with *si-Cbp* and stimulated with or without LPS. *N*=3 per group. Data are shown as the mean ± SEM and analyzed with one-way ANOVA followed by Tukey’s multiple comparisons test. Compared to PBS group, #*P* < 0.05, ###*P* < 0.001, ####*P* < 0.0001; compared to LPS group, **P* < 0.05, ***P* < 0.01, ****P* < 0.001, *****P* < 0.0001.
